# Supplementary material for: The influence of intermolecular interactions and molecular packings on mechanochromism and mechanoluminescence – a tetraphenylethylene derivative case
Source: Royal Society of Chemistry journal article supplement (doi:10.1039/c9tc04501e), 2019-01-01
Supplement: c9tc04501e1.pdf [file c9tc04501e1.pdf]

# **The Influence of Intermolecular Interactions and Molecular Packings on Mechanochromism and Mechanoluminescence — A Tetraphenylethylene Derivatives Case**

*Guangxi Huang,<sup>a</sup> Yuqing Jiang,<sup>a</sup> Jianguo Wang,<sup>d</sup> Zhen Li,<sup>c</sup> Bing Shi Li<sup>\*a</sup> and Ben  
Zhong Tang<sup>b</sup>*

<sup>a</sup>Key Laboratory of New Lithium-Ion Battery and Mesoporous Material, College of Chemistry and Environmental Engineering, Shenzhen University, 1066 Xueyuan Avenue, Nanshan, Shenzhen 518055, China. E-mail: [phbingsl@szu.edu.cn](mailto:phbingsl@szu.edu.cn)

<sup>b</sup>Hong Kong Branch of Chinese National Engineering Research, Center for Tissue Restoration and Reconstruction, Department of Chemistry, The Hong Kong University of Science and Technology, Clear Water Bay, Kowloon, Hong Kong, China.

<sup>c</sup>Hubei Key Lab on Organic and Polymeric Opto-Electronic Materials, Department of Chemistry, Wuhan University, Wuhan 430072, China

<sup>d</sup>Department of Chemistry and Chemical Engineering, Inner Mongolia University, Hohhot, 010021, China

Scheme 1. The synthetic route of compound **4** and **2**.

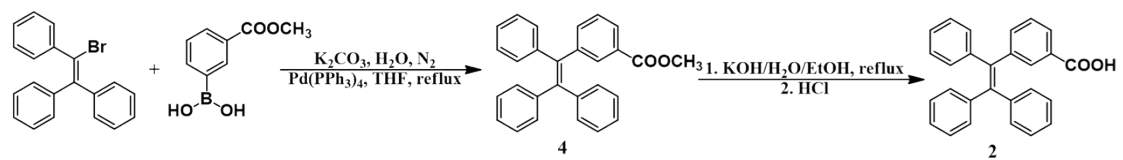

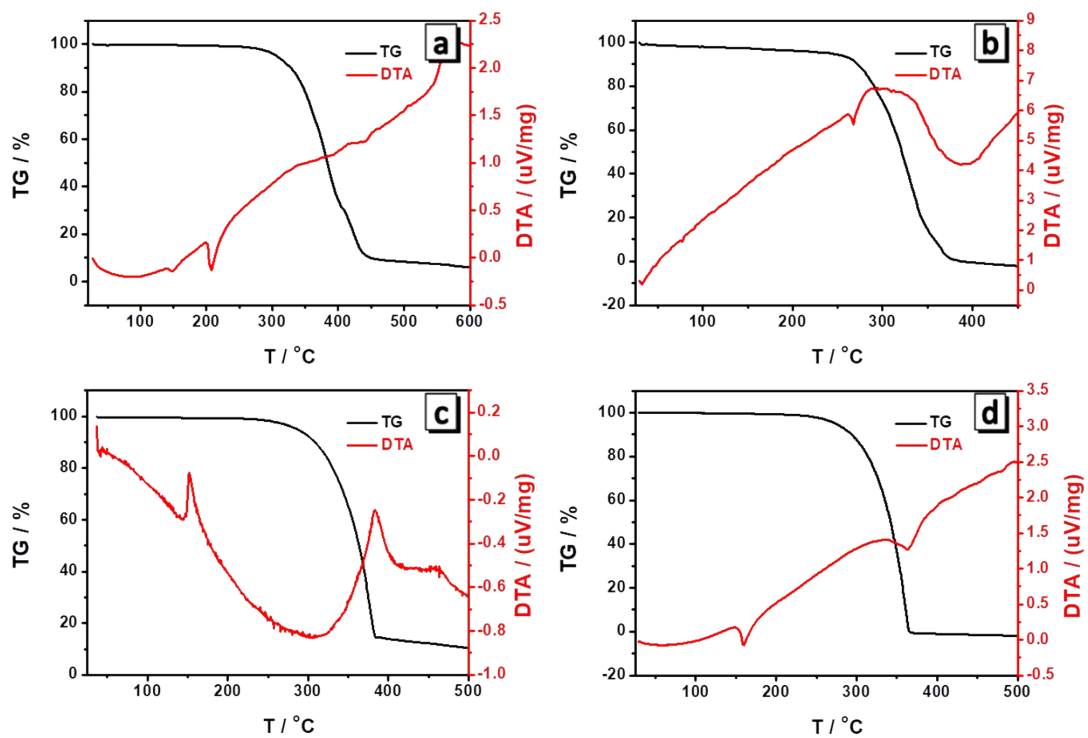

Figure S1. TG and DTA curves of 1-4.

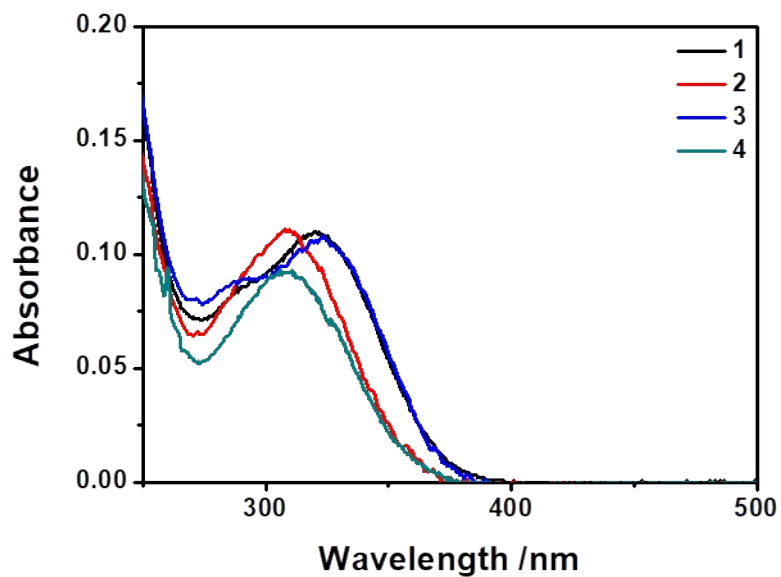

Figure S2. The absorption spectra of 1-4 in THF solution, concentration: 10  $\mu$ M.

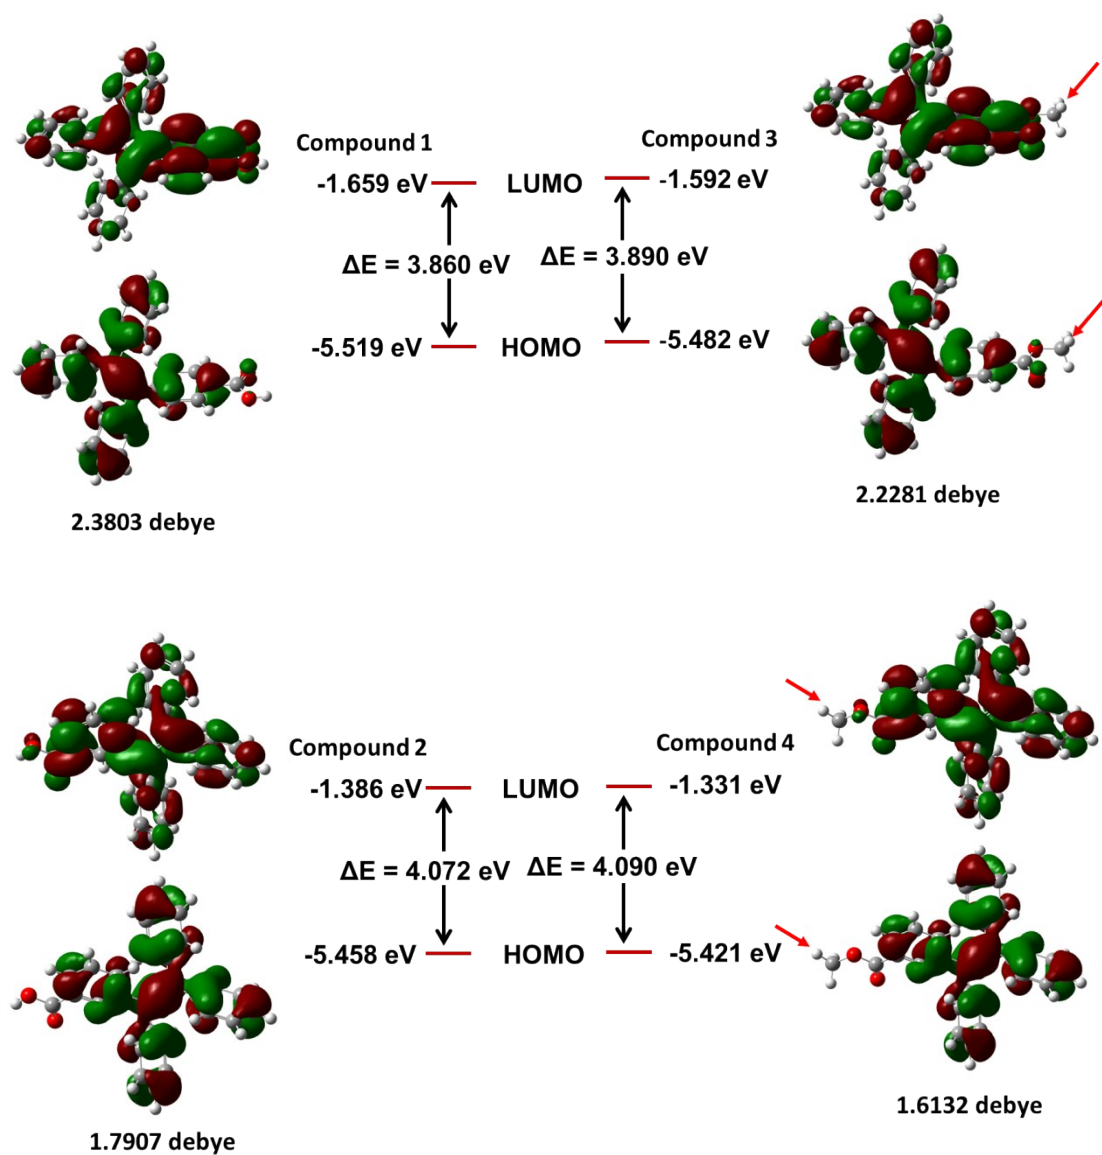

Figure S3. The HOMO and LUMO orbital distribution and dipole moment of **1-4** calculated by B3LYP/6-31+G(d). The red arrows indicated the methyl group.

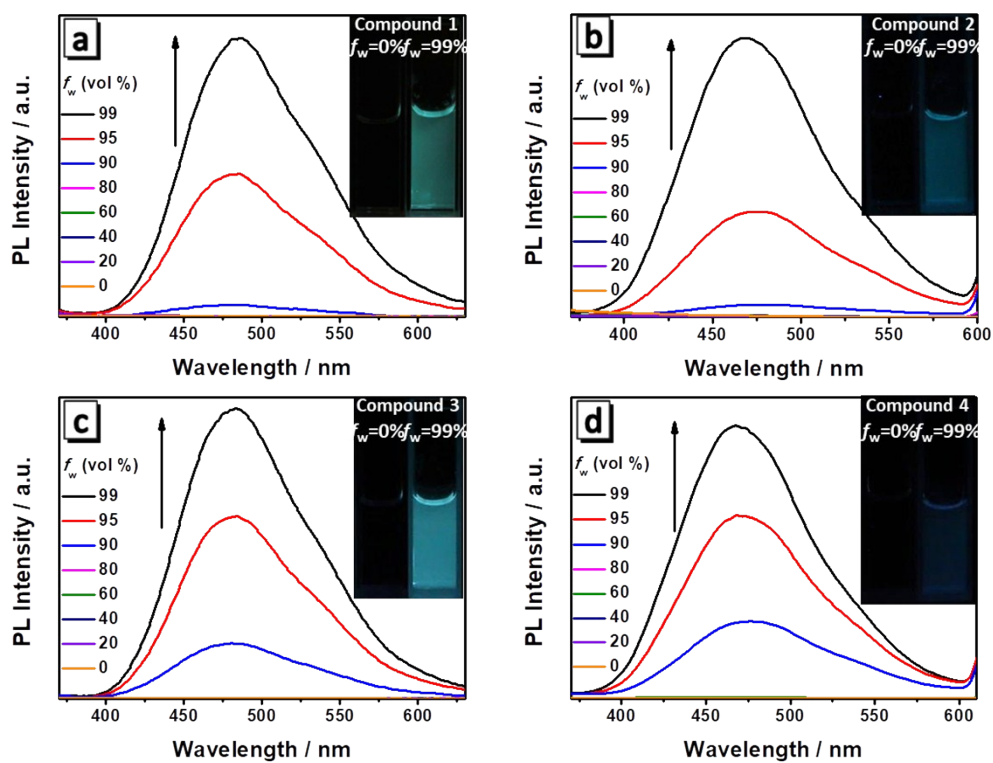

Figure S4. The fluorescence spectra of (a) **1**, (b) **2**, (c) **3** and (d) **4** in THF/water mixtures with different water fractions ( $f_w$ ), concentration: 10  $\mu$ M.

Table S1. Single crystal data of **1-3**

|                                     | <b>1</b>    | <b>2</b>    | <b>3</b>   |
|-------------------------------------|-------------|-------------|------------|
| CCDC Number                         | 1904515     | 1904516     | 1904514    |
| Formula                             | C27H20O2    | C27H20O2    | C28H22O2   |
| Formula Weight /g•mol <sup>-1</sup> | 376.43      | 376.43      | 390.46     |
| Crystal system                      | monoclinic  | monoclinic  | monoclinic |
| Space group                         | P21/c       | P21/c       | P21        |
| T/K                                 | 150         | 169.99      | 293.15     |
| Z                                   | 8           | 4           | 4          |
| a/Å                                 | 9.68410(10) | 19.8069(10) | 9.7794(2)  |
| b/Å                                 | 9.40430(10) | 5.4313(3)   | 9.5115(2)  |
| c/Å                                 | 51.7692(6)  | 19.6647(9)  | 23.9482(5) |
| $\alpha$ /°                         | 90          | 90          | 90         |
| $\beta$ /°                          | 90.9180(10) | 102.555(4)  | 101.228(2) |
| $\gamma$ /°                         | 90          | 90          | 90         |
| V/Å <sup>3</sup>                    | 4714.13(9)  | 2064.89(18) | 2184.95(8) |
| $\rho_c$ /g•cm <sup>-3</sup>        | 1.061       | 1.208       | 1.187      |
| $\mu$ /mm <sup>-1</sup>             | 0.517       | 0.590       | 0.575      |
| F(000)                              | 1584        | 788         | 824        |
| Reflections collected               | 28098       | 14694       | 13022      |
| Independent reflections             | 9296        | 3496        | 6238       |
| R <sub>int</sub>                    | 0.0272      | 0.0528      | 0.0312     |
| R <sub>1</sub> (I > 2 $\sigma$ (I)) | 0.0424      | 0.0727      | 0.0479     |
| wR <sub>2</sub>                     | 0.1105      | 0.2303      | 0.1390     |
| GOOF                                | 1.041       | 1.051       | 1.046      |

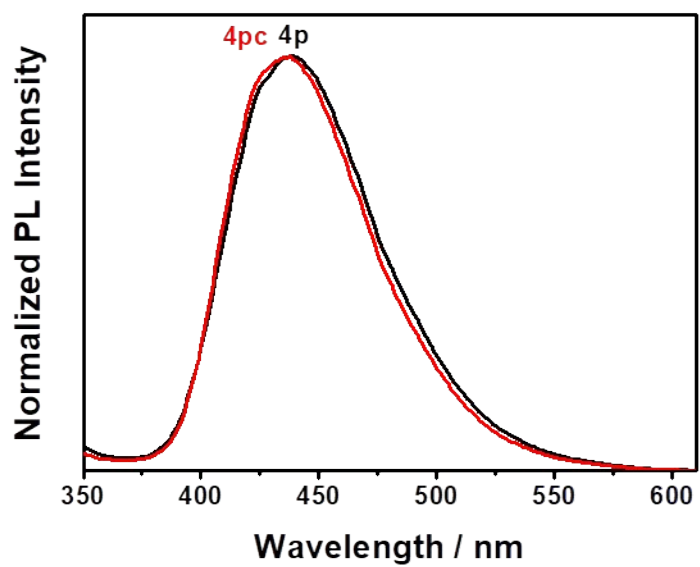

Figure S5. Normalized PL intensity of as-prepared powder (**4p**) and polycrystal (**4pc**) of **4**.

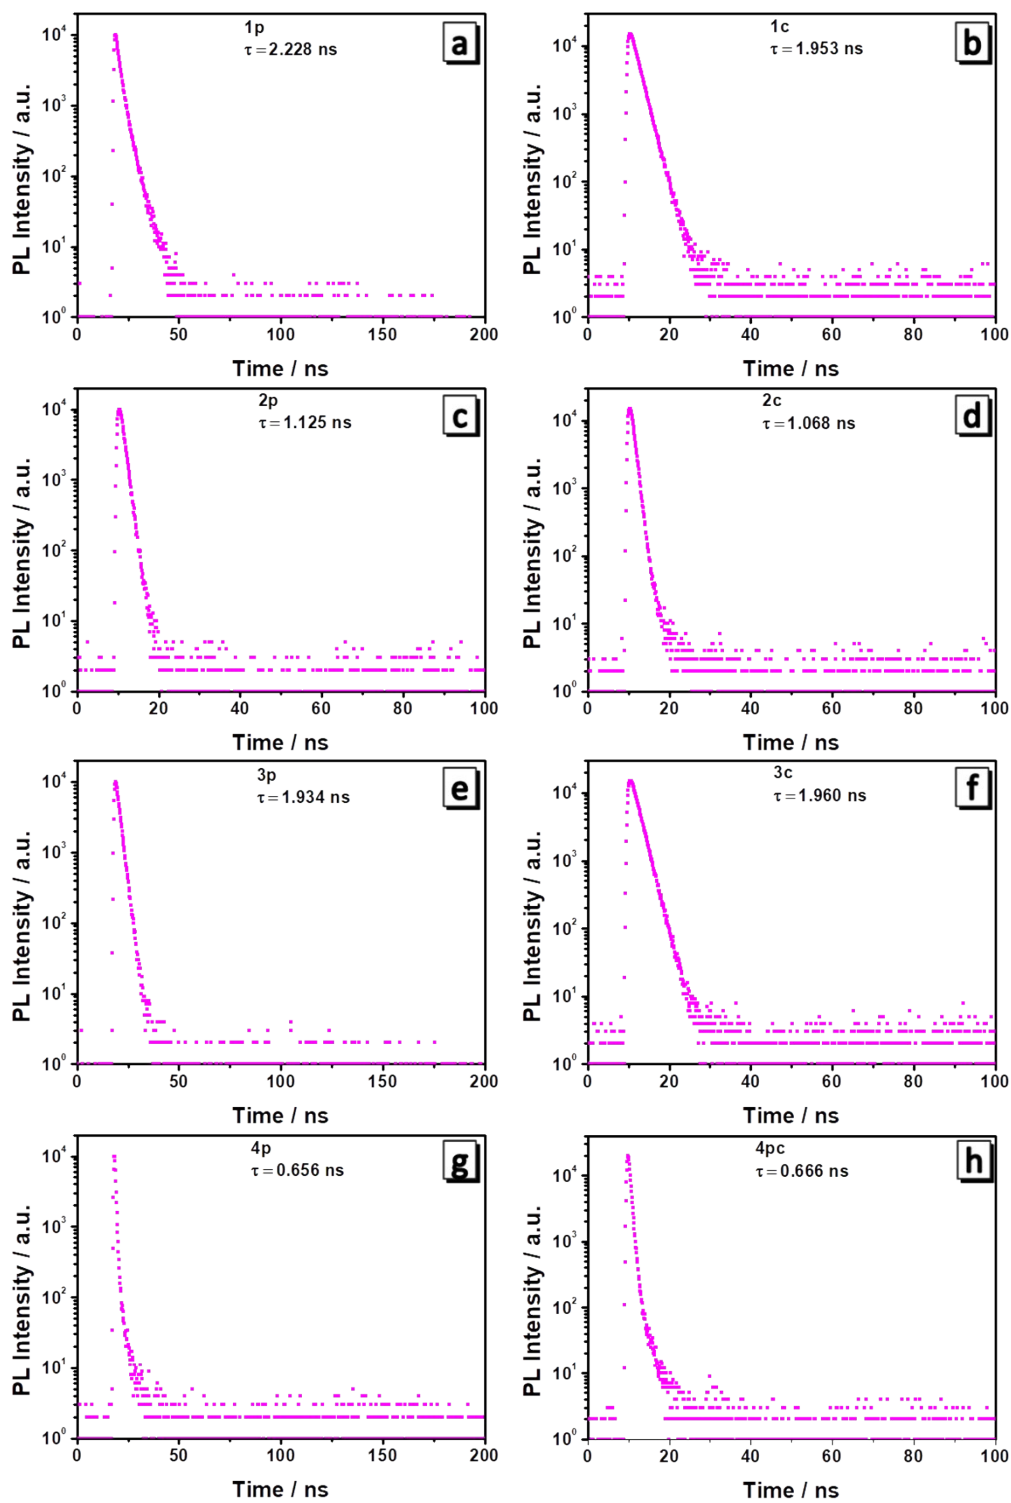

Figure S6. Fluorescence decay curves of (a) **1p**, (b) **1c**, (c) **2p**, (d) **2c**, (e) **3p**, (f) **3c**, (g) **4p** and (h) **4pc**.



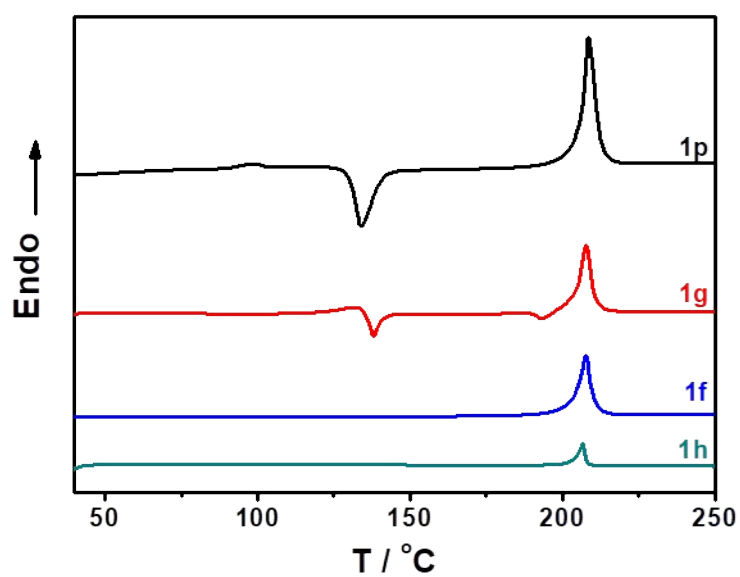

Figure S7. DSC curves of the as-prepared powder (**1p**), ground powder (**1g**), fumed powder (**1f**) and heated powder (**1h**) of **1**.

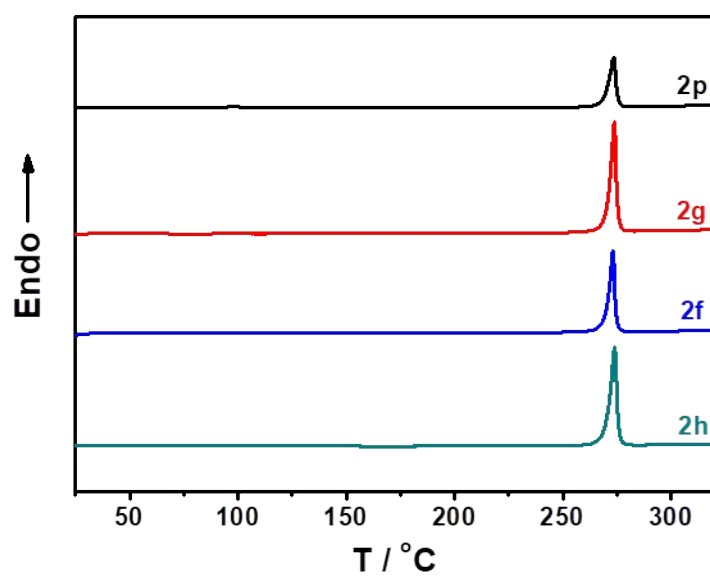

Figure S8. DSC curves of the as-prepared powder (**2p**), ground powder (**2g**), fumed powder (**2f**) and heated powder (**2h**) of **2**.

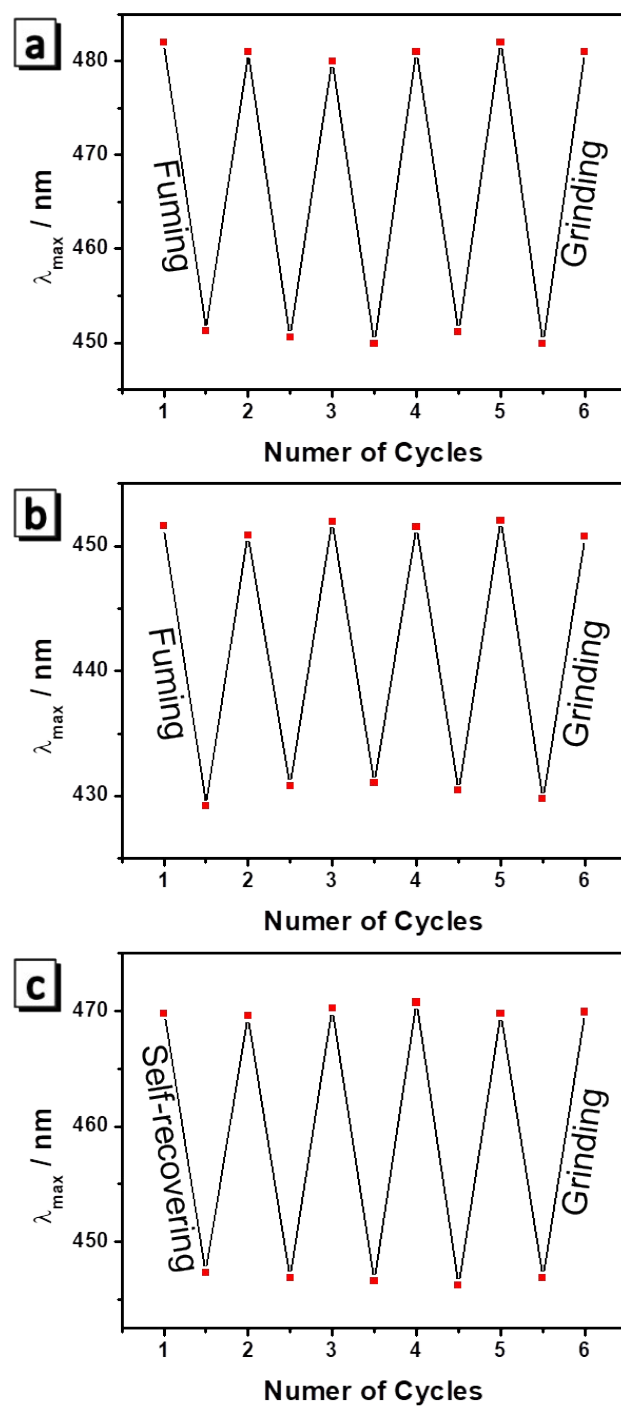

Figure S9. Maximum emission wavelength changes of (a) 1 and (b) 2 cast weighing paper versus dichloromethane fuming/grinding cycles. Maximum emission wavelength changes of (c) 3 cast weighing paper versus self-recovering/grinding cycles.

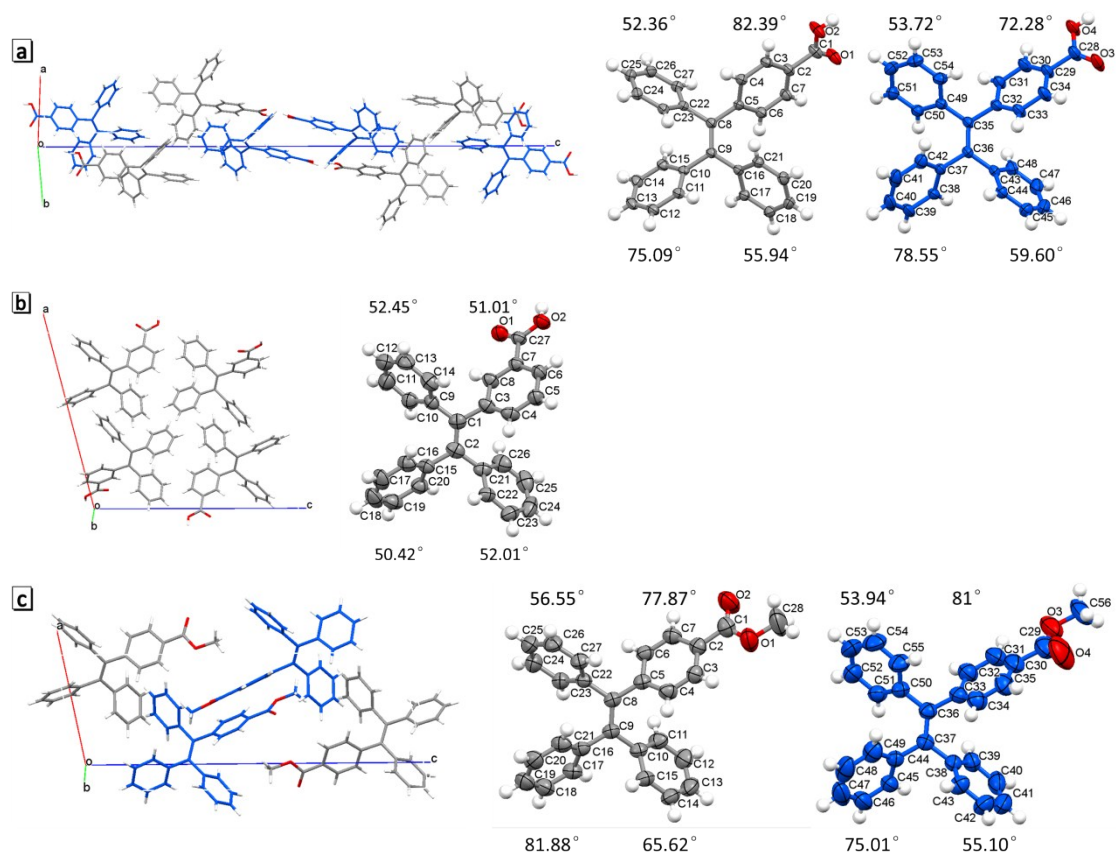

Figure S10. The unit cell and molecular conformations with labels of carbon/oxygen atoms and dihedral angles (between the phenyl ring and central ethene group) of single crystals (a) **1**, (b) **2** and (c) **3**. Ellipsoids represent the 50% probability level. Hydrogen atoms are shown as spheres of arbitrary radii.

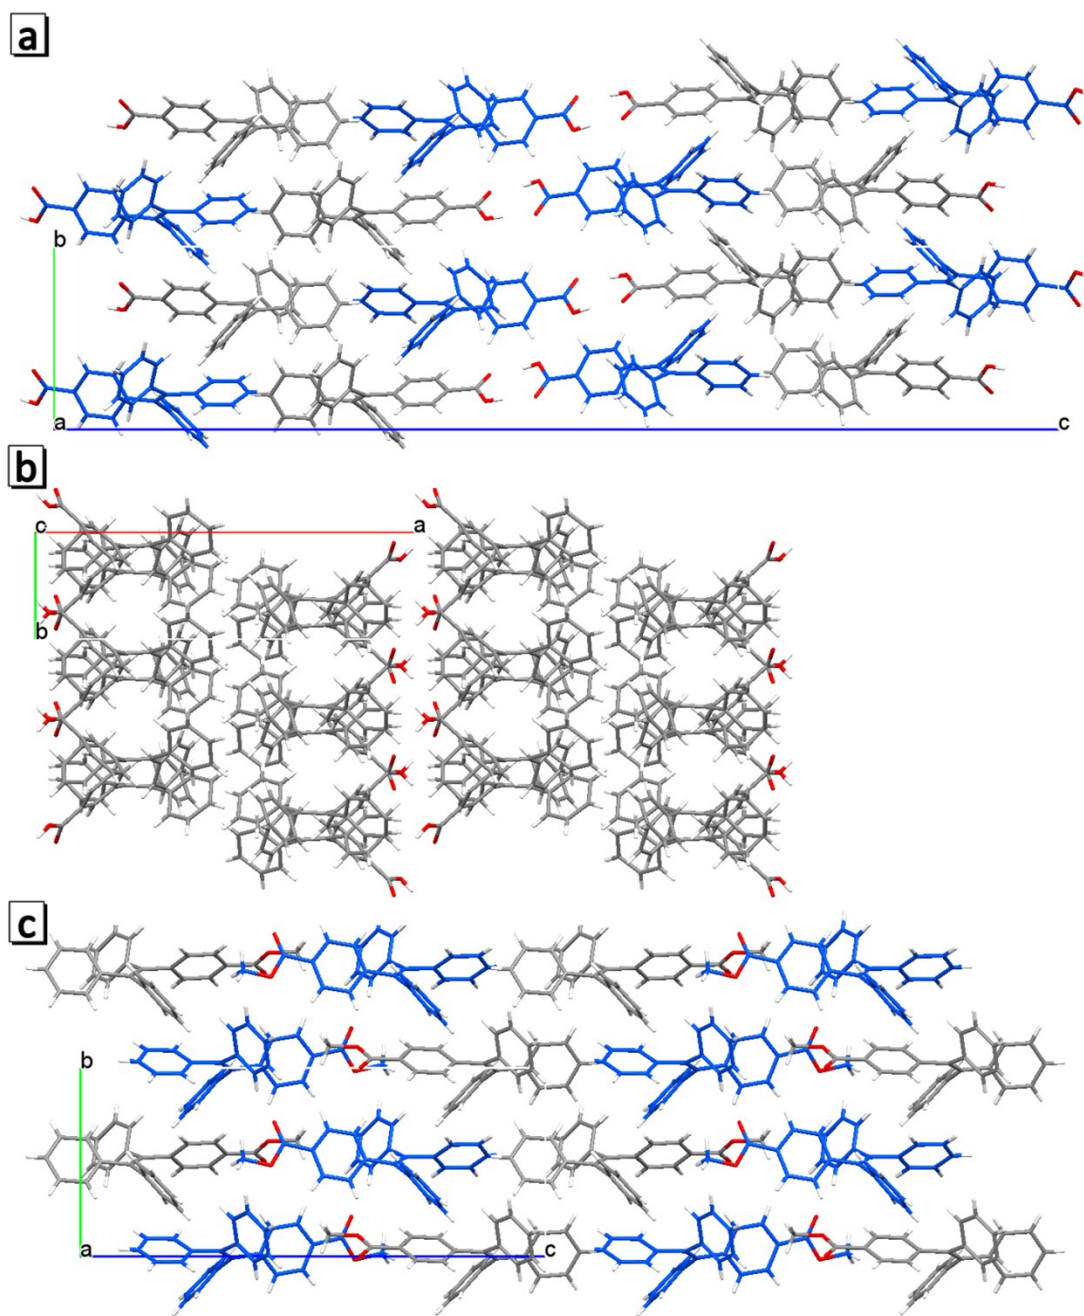

Figure S11. The lamellar stacking in single crystals (a) 1, (b) 2 and (c) 3.

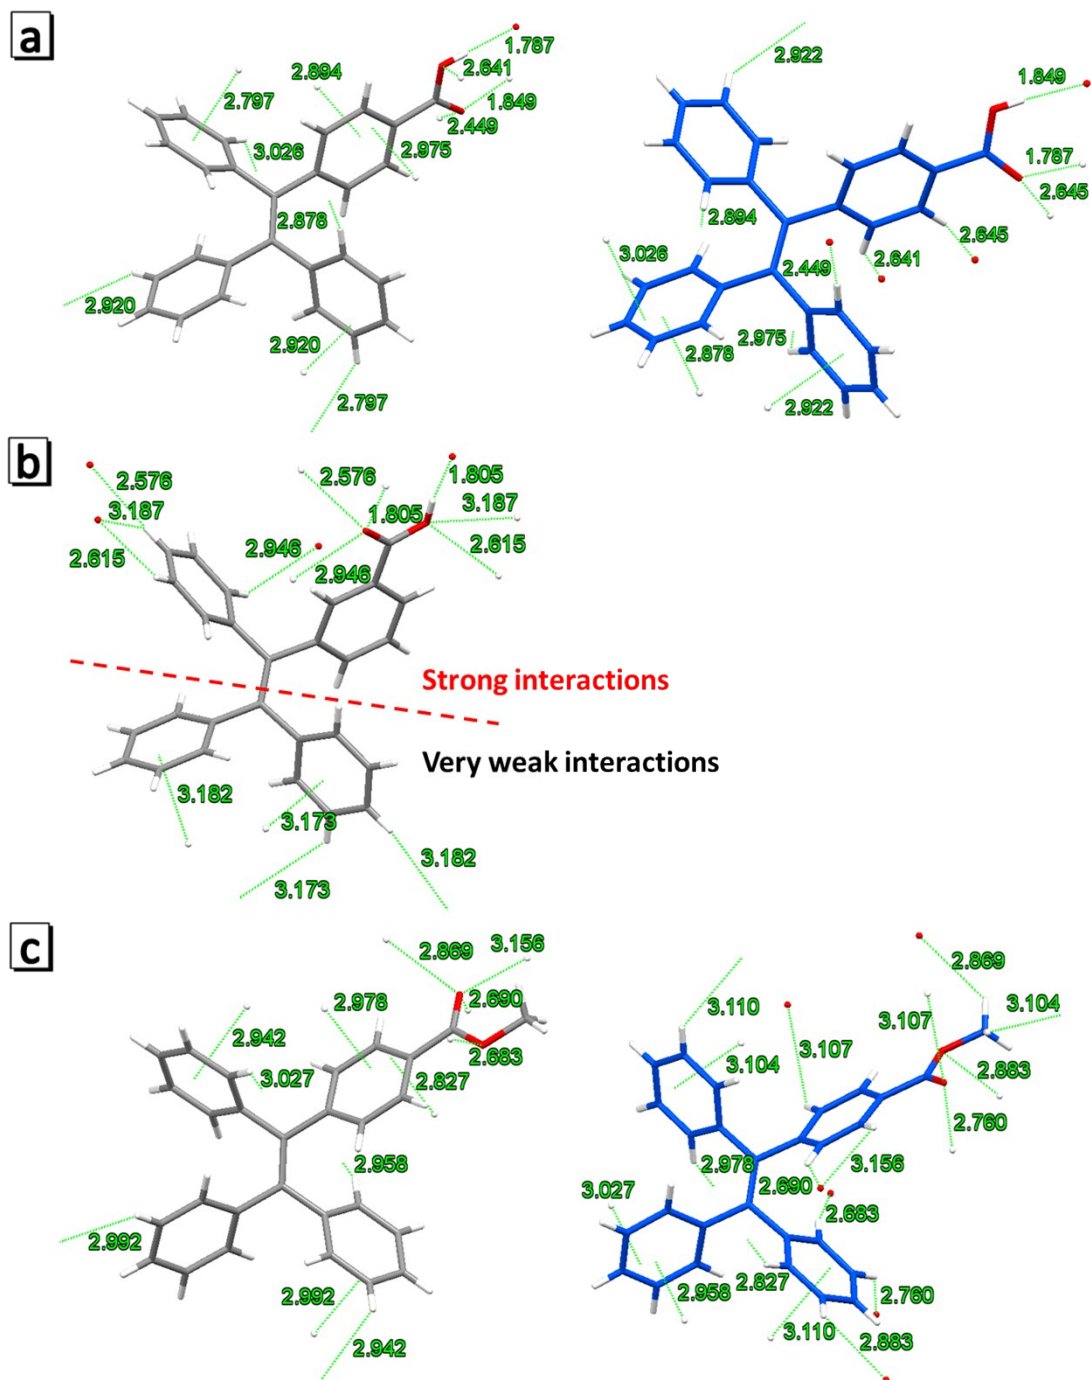

Figure S12. The detailed intermolecular interactions of every conformation in single crystals (a) 1, (b) 2 and (c) 3. Bond length of C-H... $\pi$  interaction is the distance between hydrogen atom and the plane of benzene ring.

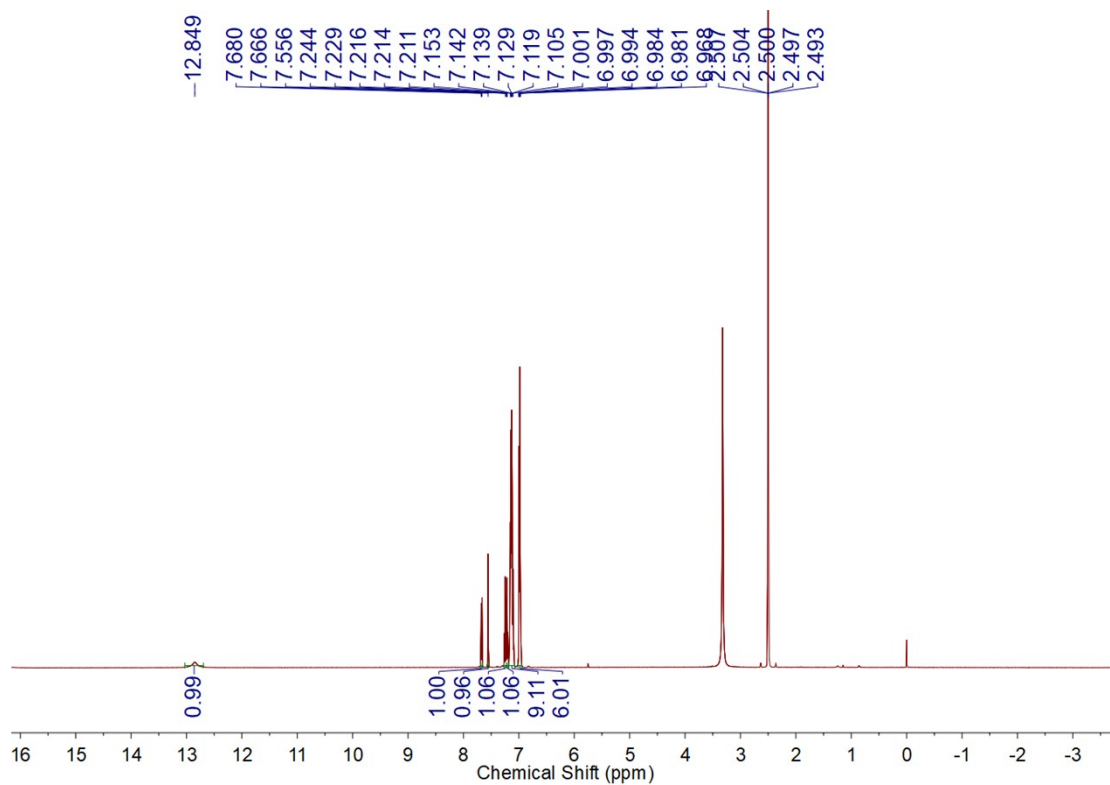

Figure S13.  $^1\text{H}$  NMR of compound **2**.

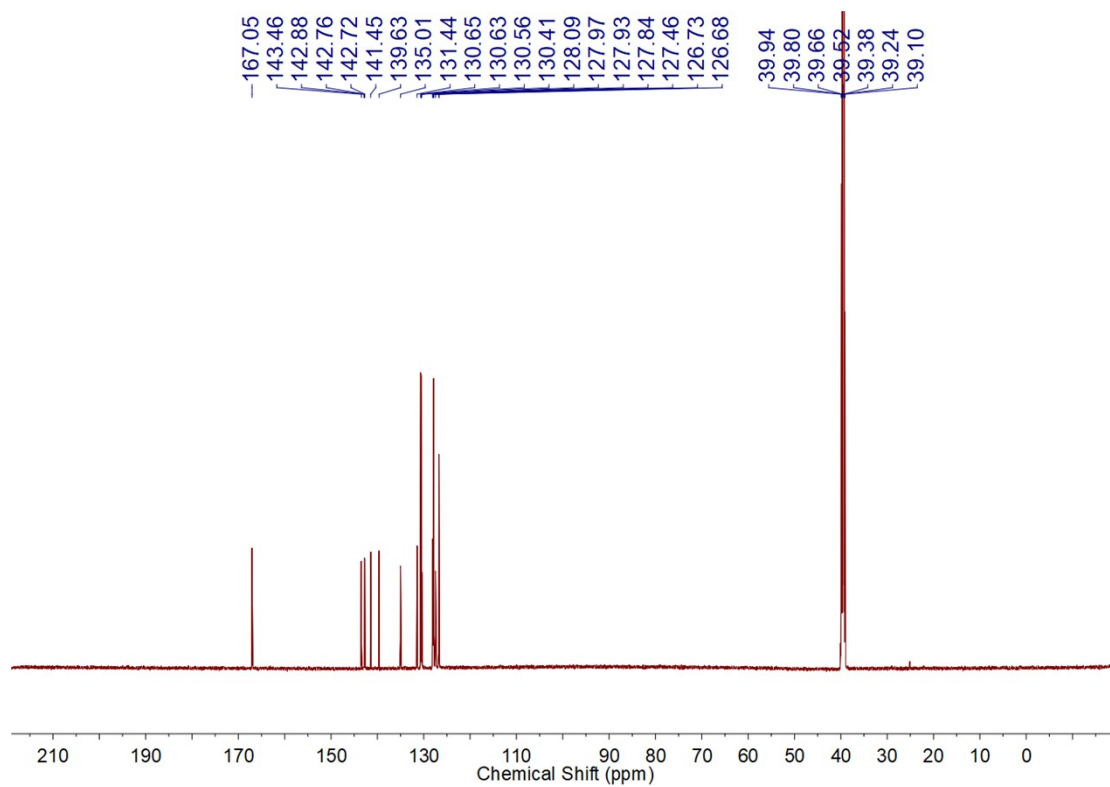

Figure S14.  $^{13}\text{C}$  NMR of compound **2**.

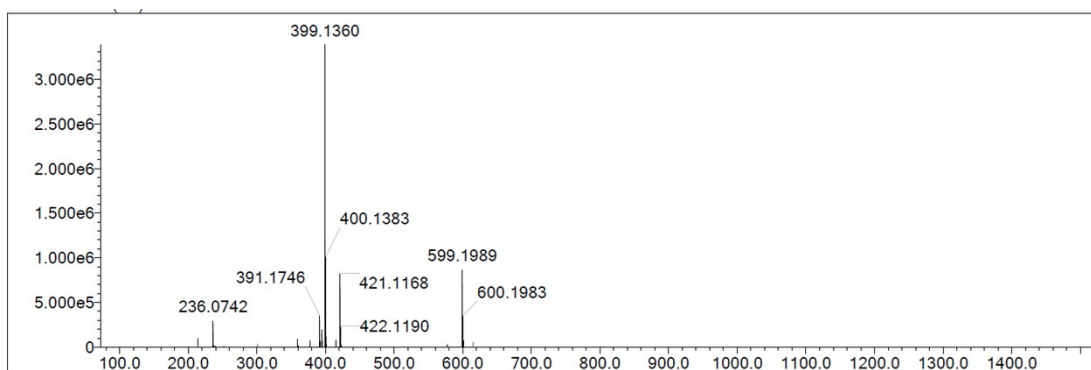

Figure S15. HRMS of compound 2.

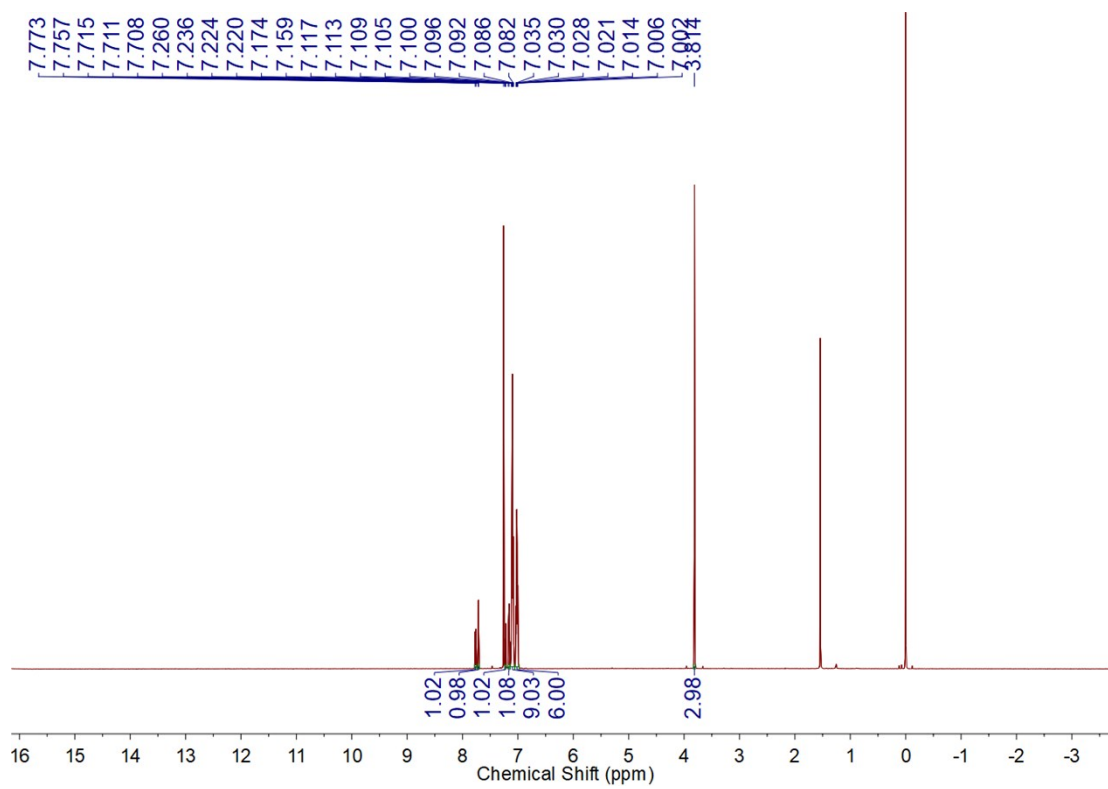

Figure S16. <sup>1</sup>H NMR of compound 4.

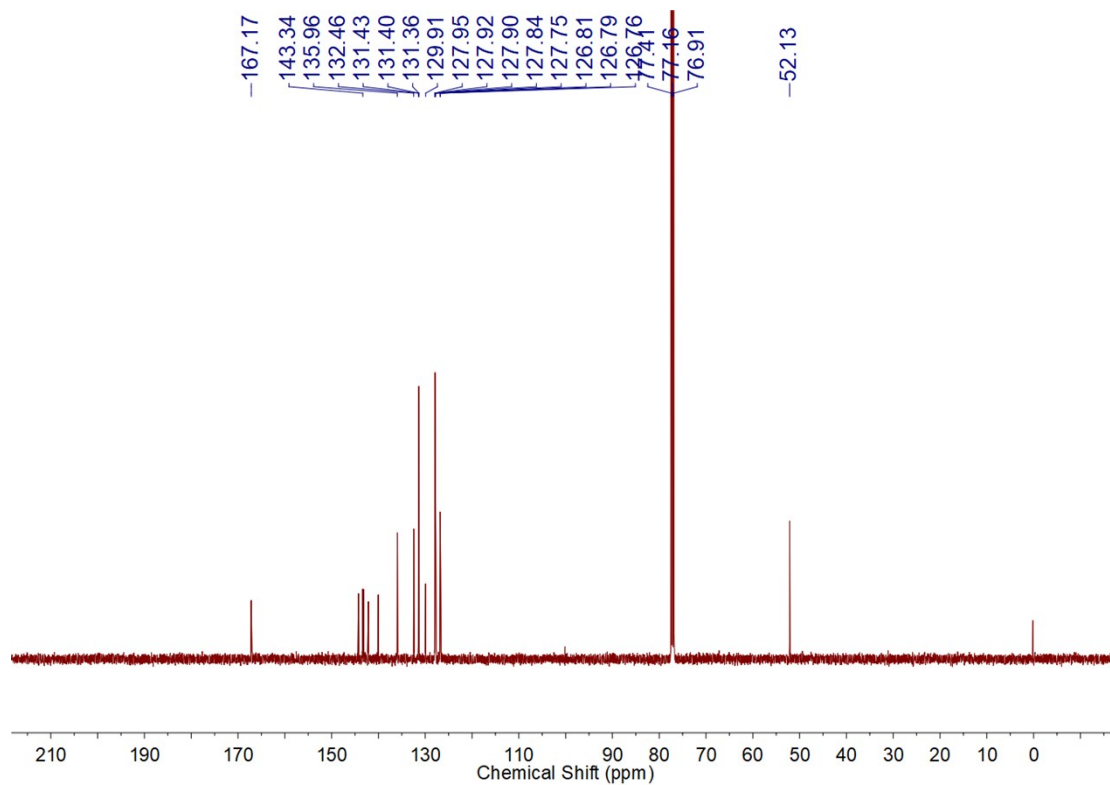

Figure S17.  $^{13}\text{C}$  NMR of compound **4**.

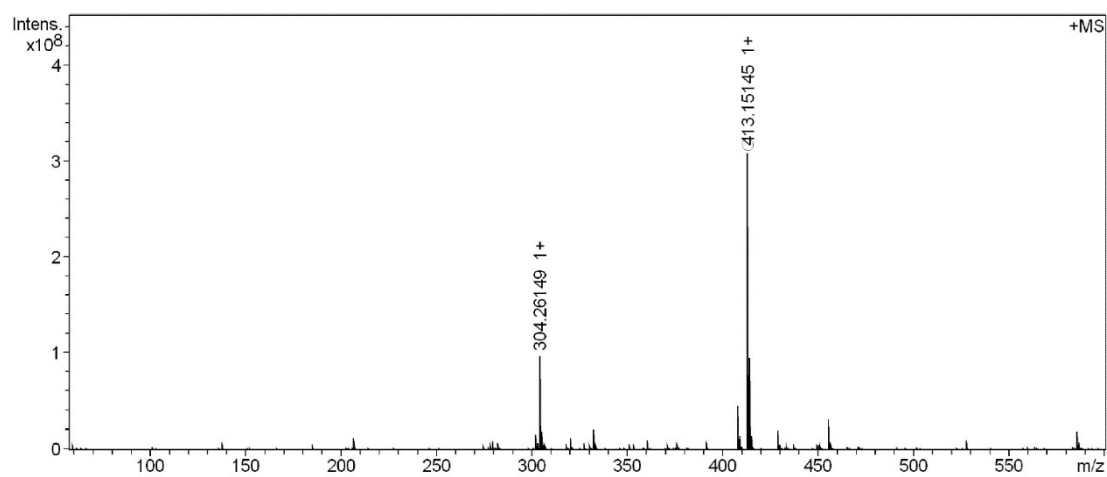

Figure S18. HRMS of compound **4**.
